# Supplementary material
Source: Research Square preprint supplement (doi:10.21203/rs.3.rs-9445202/v1)
Supplement: Supplementary file 1 [file f4b42db6be7454d463a698d4.docx]

Additional file 1. Supplementary Table S1. Mapping of the nine secondary indicators to the four primary domains of health needs

| Primary domain | Secondary indicator | Representative content area | Scoring rule |
| --- | --- | --- | --- |
| Eldercare Security Needs | Policy and institutional support | Need for clearer policy support, service entitlement, institutional arrangements, and community-level guarantees for later-life care | Sum of all item scores under this secondary indicator; included in the total score for Eldercare Security Needs |
| Eldercare Security Needs | Community infrastructure | Need for age-friendly facilities, barrier-free environments, accessible community infrastructure, and supportive neighborhood conditions | Sum of all item scores under this secondary indicator; included in the total score for Eldercare Security Needs |
| Eldercare Security Needs | Home-based care | Need for home visits, daily living support, in-home care services, and assistance with later-life care at home | Sum of all item scores under this secondary indicator; included in the total score for Eldercare Security Needs |
| Eldercare Security Needs | Financial support | Need for pension-related protection, financial assistance, subsidies, and affordability of community and care services | Sum of all item scores under this secondary indicator; included in the total score for Eldercare Security Needs |
| Social Participation and Development Needs | Health education | Need for health lectures, disease-prevention knowledge, health information, self-management education, and learning opportunities | Sum of all item scores under this secondary indicator; included in the total score for Social Participation and Development Needs |
| Physical and Mental Health Needs | Health maintenance | Need for preventive care, chronic disease management, health monitoring, rehabilitation follow-up, and maintenance of functional ability | Sum of all item scores under this secondary indicator; included in the total score for Physical and Mental Health Needs |
| Physical and Mental Health Needs | Medical services | Need for clinical consultation, diagnosis and treatment, rehabilitation services, and routine medical care | Sum of all item scores under this secondary indicator; included in the total score for Physical and Mental Health Needs |
| Physical and Mental Health Needs | Mental health | Need for mental health support, emotional regulation, psychological counseling, and coping support | Sum of all item scores under this secondary indicator; included in the total score for Physical and Mental Health Needs |
| Social-Emotional Needs | Social interaction needs | Need for interpersonal communication, companionship, family contact, social interaction, and social connectedness | Sum of all item scores under this secondary indicator; included in the total score for Social-Emotional Needs |

Note: The questionnaire was pre-structured into four primary domains and nine secondary indicators. For the main analyses, item scores within each secondary indicator were summed, and the corresponding secondary indicators were then grouped under the four primary domains to generate domain total scores.
